# Supplementary material
Source: MDPI journal article supplement (https://www.mdpi.com/1996-1073/14/2/298)
Supplement: s1 [file s1]

## **List of Supplementary Figures**

Figure S1. Decision tree of Tianshengqiao plant 1 generated for C4.5 summer season

Figure S2. Decision tree of Tianshengqiao plant 2 generated for C4.5 winter season

Figure S3. Decision tree generated by CHAID of Tianshengqiao plant 1 for winter season

Figure S4. Decision tree generated by CHAID of Tianshengqiao plant 2 for summer season

Figure S5. Decision tree by using ID3 algorithm Tianshengqiao plant 1 for winter season

Figure S6. Decision tree by using ID3 algorithm Tianshengqiao plant 2 for summer season

Figure S7. Decision tree by using improved C4.5 Tianshengqiao plant 1 for winter season

Figure S8. Decision tree by using improved C4.5 Tianshengqiao plant 2 for summer season

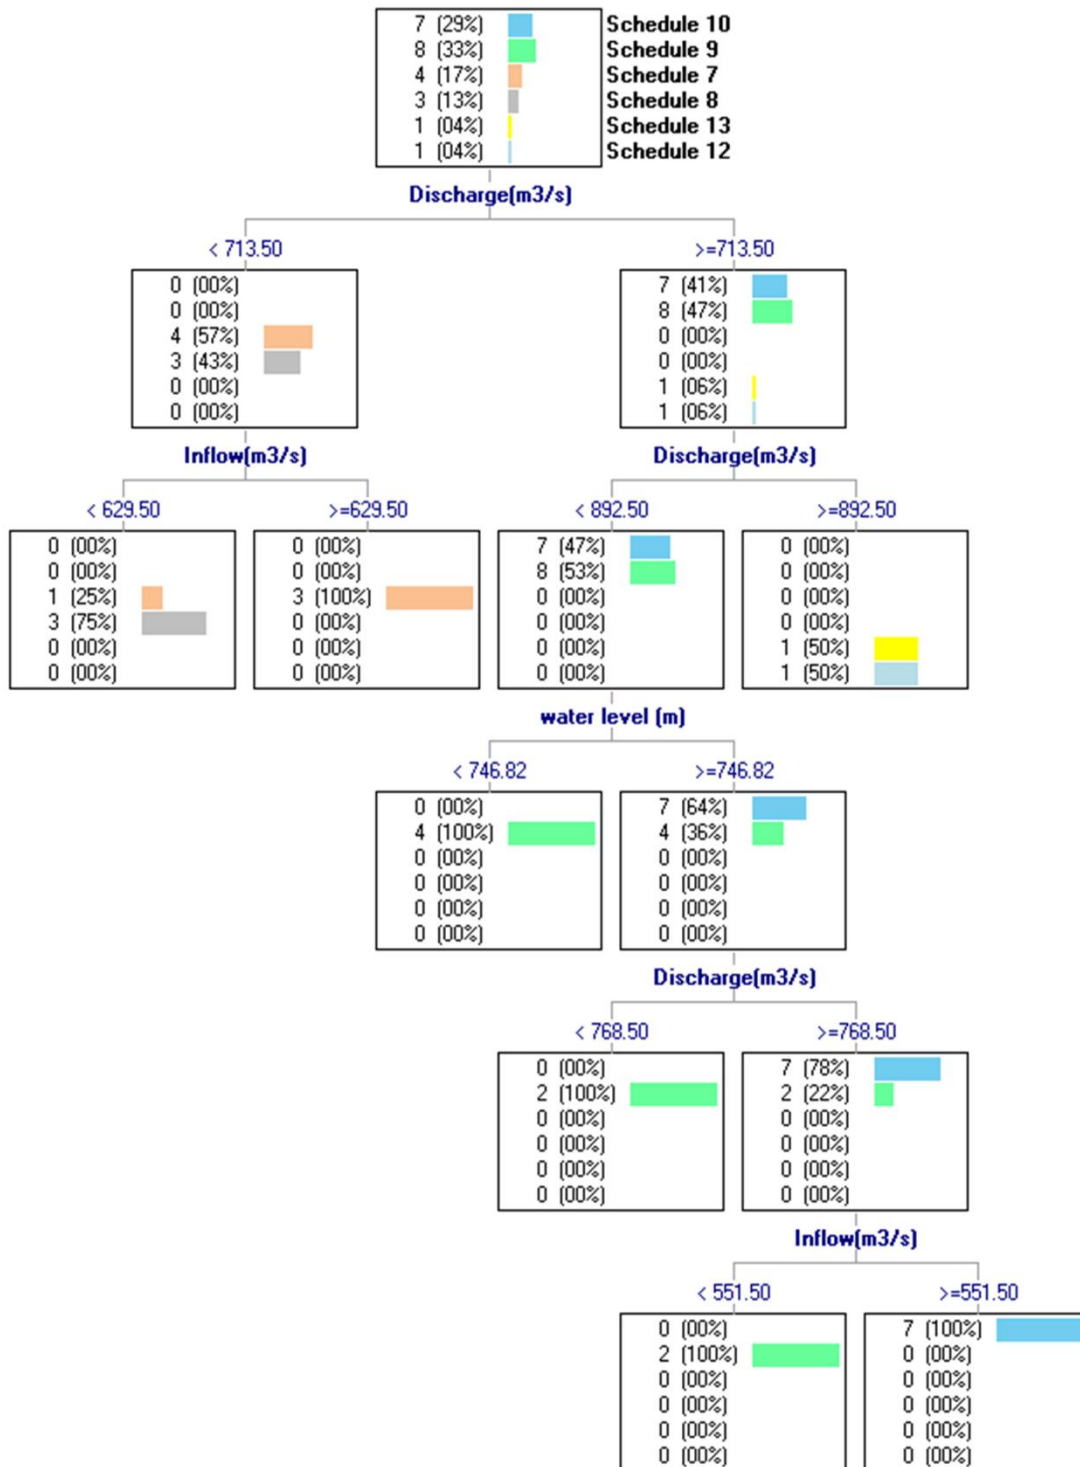

Figure S1. Decision tree of Tiansheng qiao plant 1 generated for C4.5 summer season

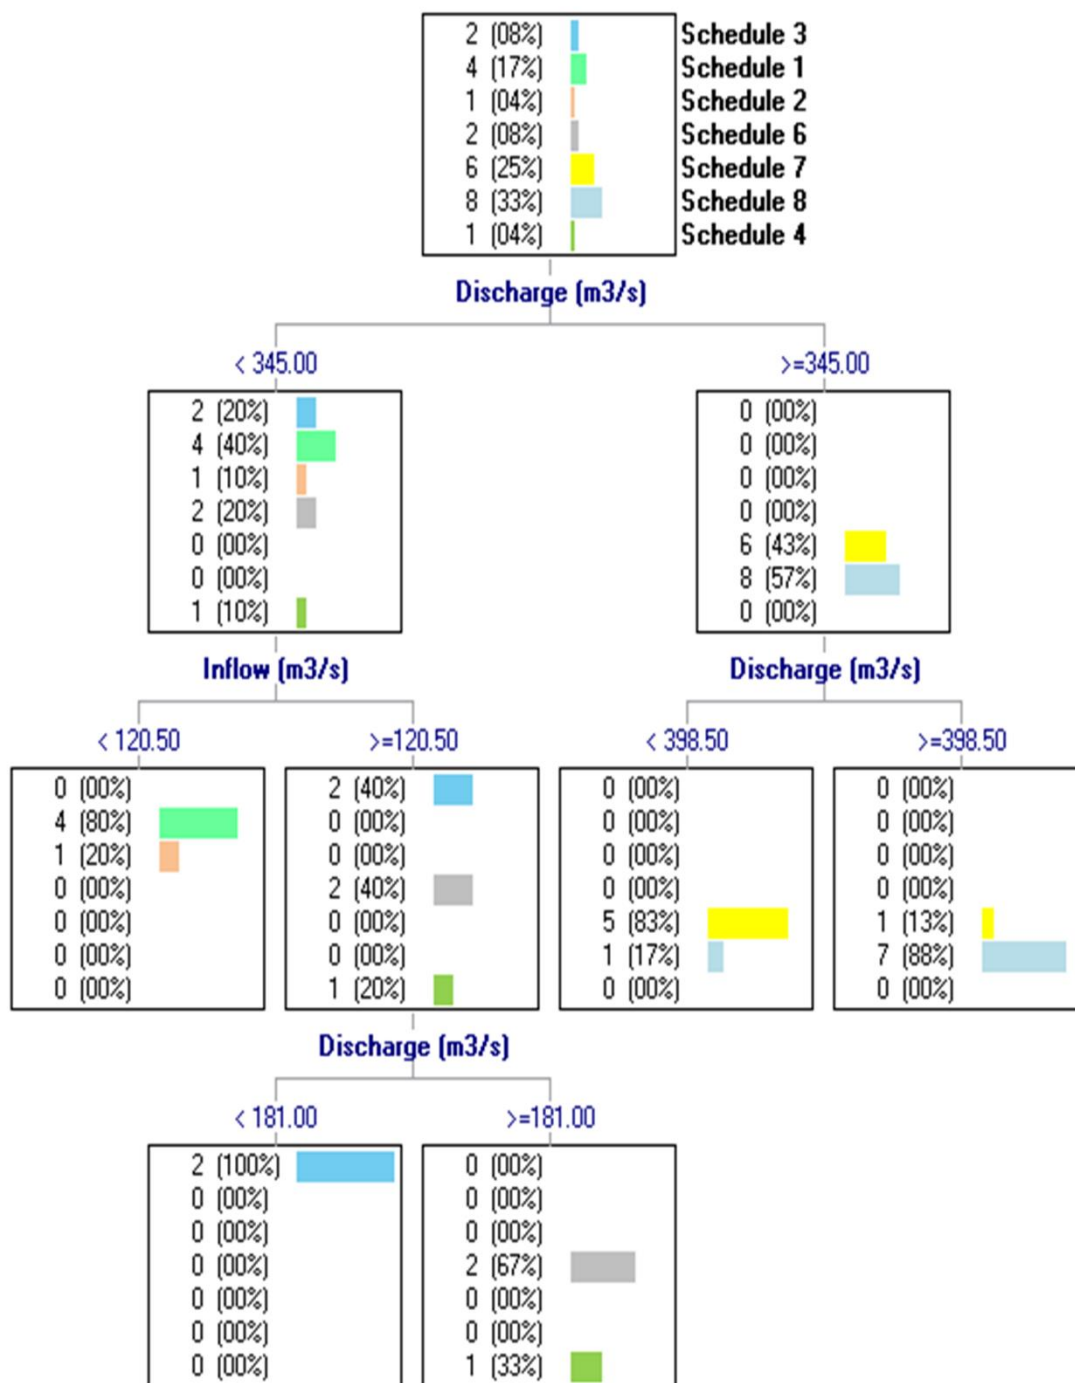

Figure S2. Decision tree of Tianshengqiao plant 2 generated for C4.5 winter season

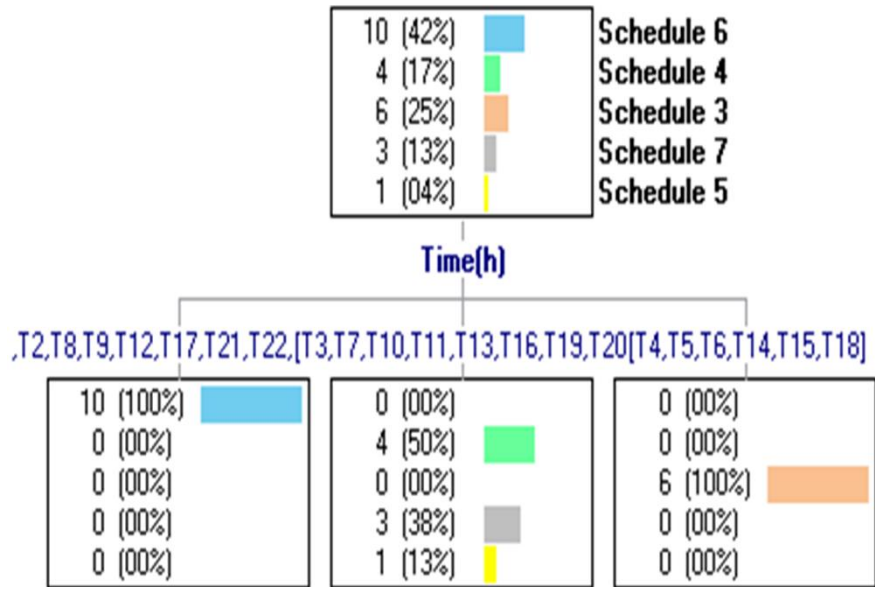

Figure S3. Decision tree generated by CHAID of Tianshengqiao plant 1 for winter season

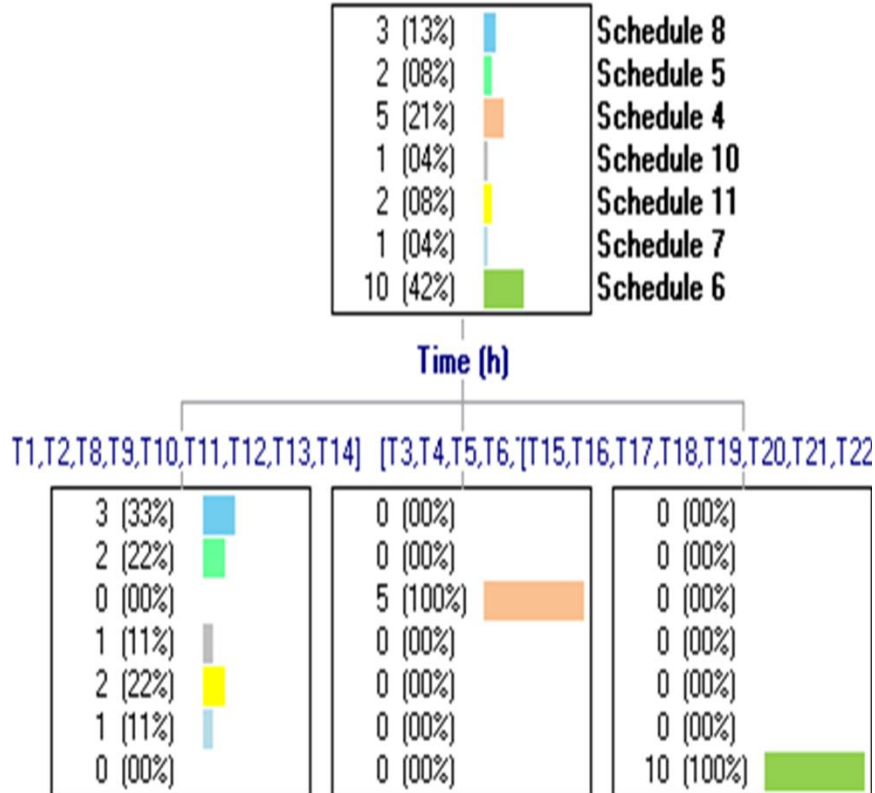

Figure S4. Decision tree generated by CHAID of Tianshengqiao plant 2 for summer season

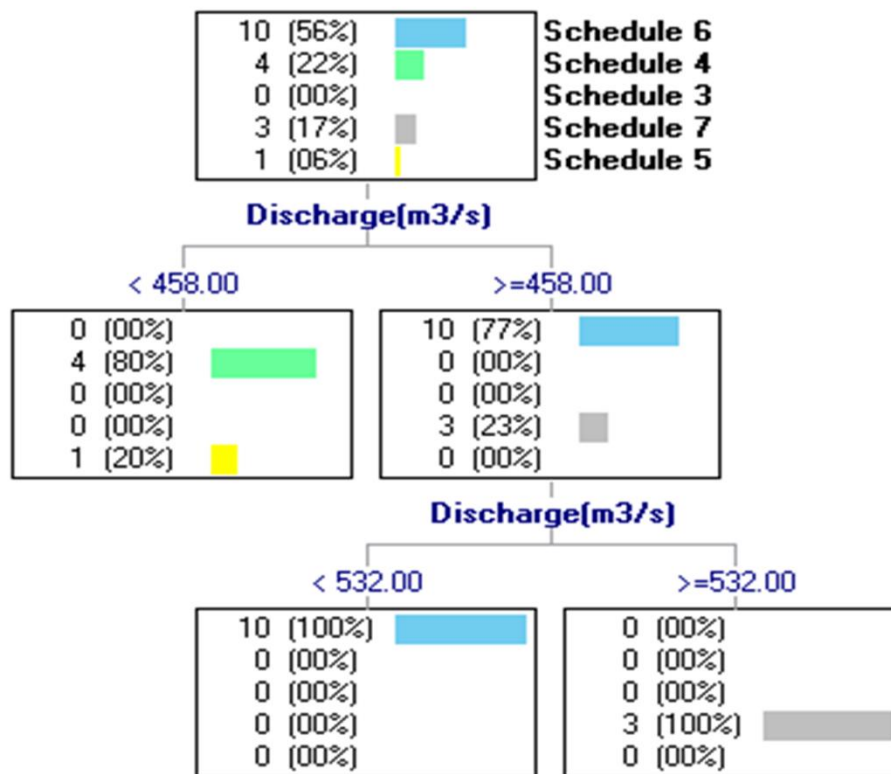

Figure S5. Decision tree by using ID3 algorithm Tianshengqiao plant 1 for winter season

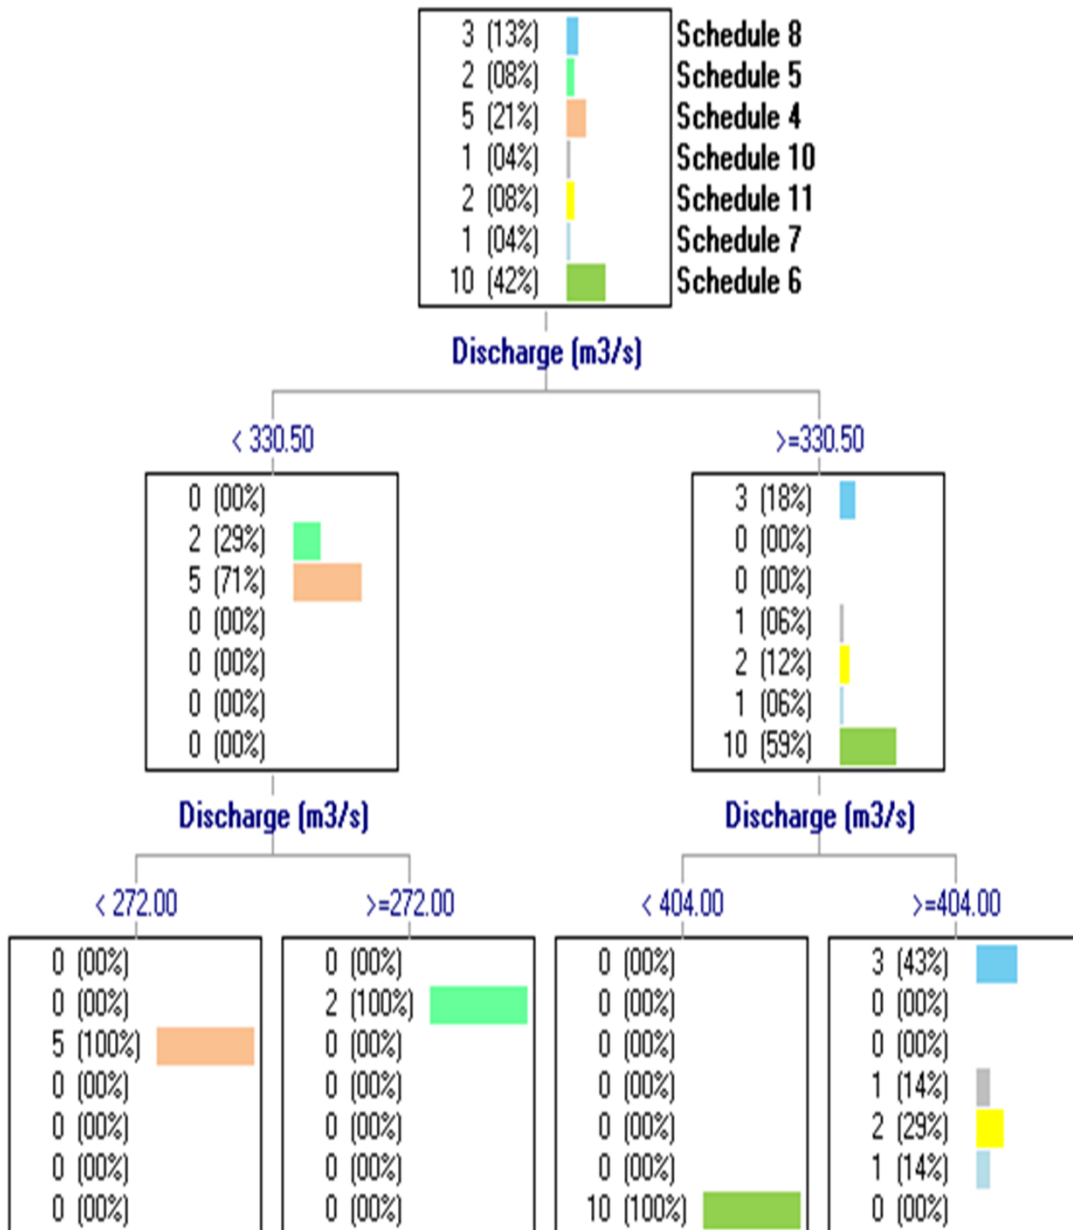

Figure S6. Decision tree by using ID3 algorithm Tianshengqiao plant 2 for summer season

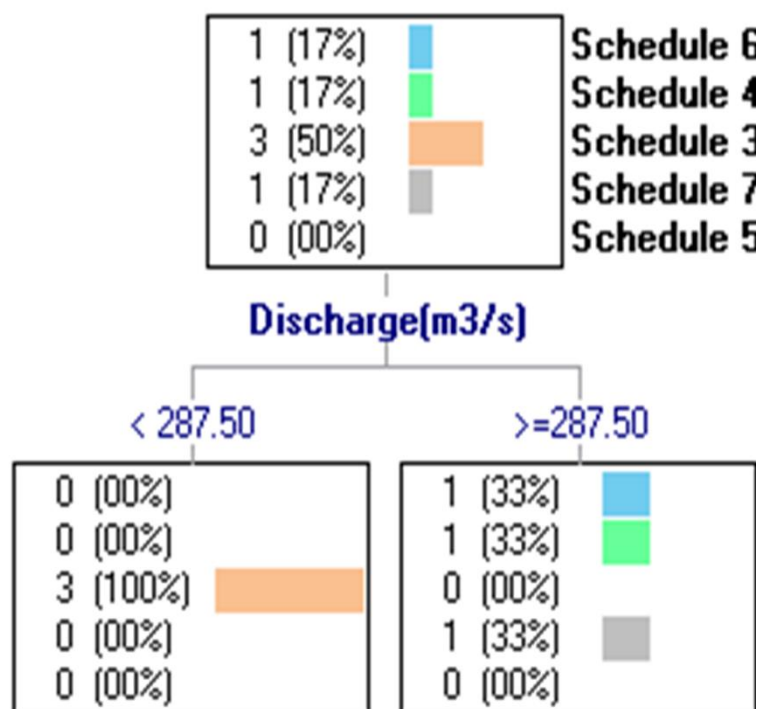

Figure S7. Decision tree by using improved C4.5 Tianshengqiao plant 1 for winter season

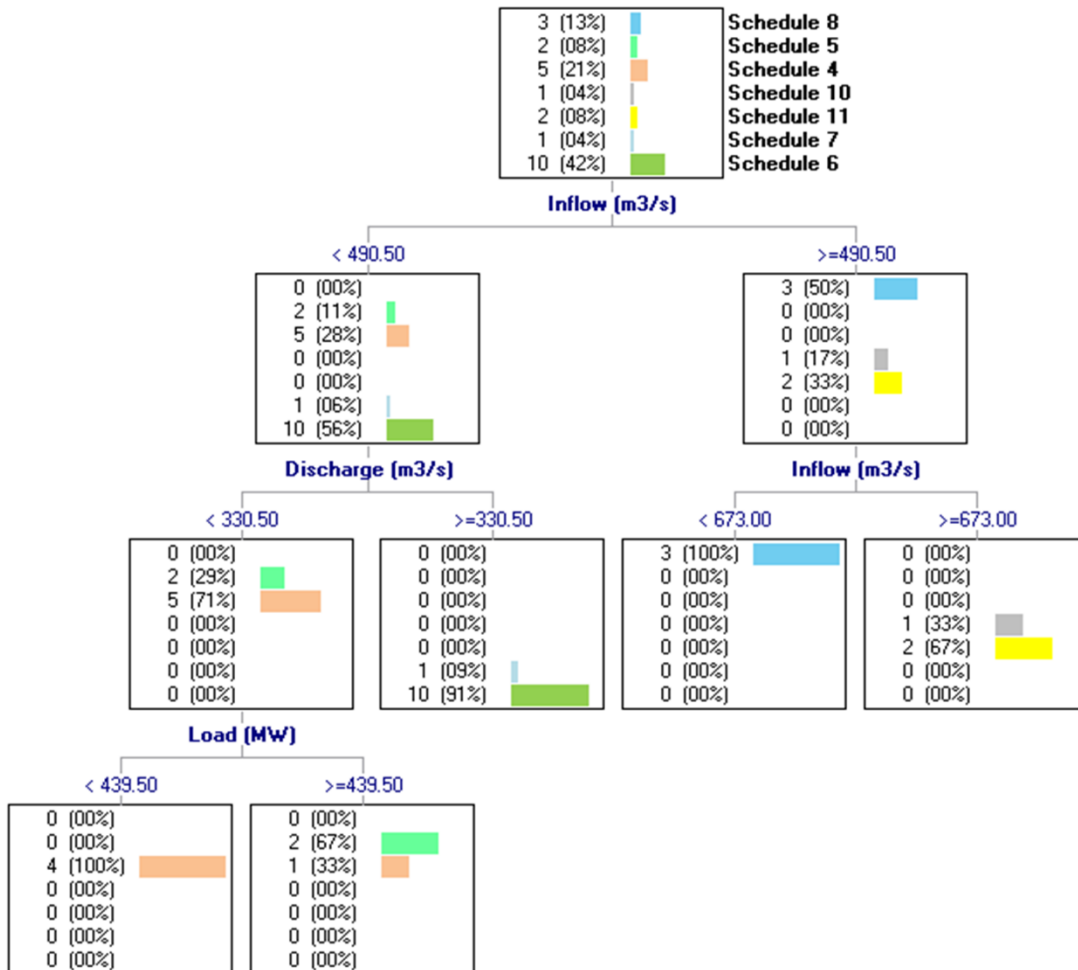

Figure S8. Decision tree by using improved C4.5 Tianshengqiao plant 2 for summer season
